# Supplementary material
Source: publisher figshare collection journal article supplement (https://asha.figshare.com/ndownloader/files/35247874)
Supplement: Supplementary file 1 [file 35247874]

**Supplemental Material S1.** Selected studies with reported maintenance and/or generalization of treatment for PPA.

| Author/Year of Publication | PPA                  | Type of Intervention                                                                                                                                                          | Gains Immediately Post-Intervention                              | Maintenance                             | Generalisation                                                                                                                                                                                    |
|----------------------------|----------------------|-------------------------------------------------------------------------------------------------------------------------------------------------------------------------------|------------------------------------------------------------------|-----------------------------------------|---------------------------------------------------------------------------------------------------------------------------------------------------------------------------------------------------|
| Beales et al. 2021         | 4 Sv<br>4 Lv<br>4 AD | Clinician-prompted, self-prompted & communication partner-prompted cueing strategies (semantic, autobiographical, phonological & orthographic)                                | YES: Nouns, Verbs & Adjectives: improvement for all three groups | YES: 6 wks post-tx for all three groups | YES: Within-level generalization to untreated items found for all three groups                                                                                                                    |
| Beeson et al. 2011         | 1 Lv                 | 24 hrs with clinician + 15 hrs of homework<br>30 items x 12 categories<br>Pictures with labels, sub-categorization and elaboration used: generative naming – intense schedule | YES: Pt appeared to learn self-cueing strategies                 | YES: 6 mos-post                         | YES: 1) confrontation naming for untreated items, 2) narrative speech (increased speaking rate & information density), 3) day-to-day spoken communication as reported by the patient & his family |
| Bier et al. 2009           | Sv                   | 8 items, phonological-semantic therapy with cueing hierarchy and semantic feedback. Alternating tx: ABCBCBCA                                                                  | YES: names and specific attributes<br>NO: general attributes     | YES: up to 5 weeks                      | NO: no generalization within or between semantic categories on naming and letter fluency tasks                                                                                                    |
| Cadorio et al 2017         | PPA                  | Review of 25 treatment studies published 2000-2016                                                                                                                            | YES                                                              | YES: not variant - dependent            | YES but variant-dependent: Rigid and context-dependent in Sv; Better in Lv & Nfv                                                                                                                  |
| Croot 2018                 |                      | Comparison of 5 tx methods<br>1-Look, listen, repeat<br>2-Cueing techniques<br>3-Semantic tx<br>4-Lexical retrieval in context<br>5-Standard naming tx                        | YES<br>Benefits of prophylactic tx                               | YES: varied according to tx, No pattern | Limited: suggested that tx should focus on maintenance of core vocabulary                                                                                                                         |
| Dressel et al. 2010        | 1 Sv                 | Sem+phon cueing; 4 wk intensive; pre-post; +fMRI; ABBA design                                                                                                                 | Right inferior and superior frontal gyrus changes                | YES: at 2 mos                           | NO: no generalization to untreated items on a naming task                                                                                                                                         |

|                           |              |                                                                                                                                          |                                                         |                                                                                         |                                                                                                                                                                                    |
|---------------------------|--------------|------------------------------------------------------------------------------------------------------------------------------------------|---------------------------------------------------------|-----------------------------------------------------------------------------------------|------------------------------------------------------------------------------------------------------------------------------------------------------------------------------------|
| Frattali 2004             | 1 Sv         | Conversation about semantic features and associates of photographed items. 12 x 2 hour sessions over 3 months; Errorless approach        | YES: for treated nouns and verbs                        | <b>NO:</b> when tested 3 mos post-tx                                                    | <b>NO:</b> no generalization to novel sets of untreated nouns and verbs                                                                                                            |
| Graham et al. 1999, 2001  | Sv           | Practicing at home exemplars from semantic categories (name + picture), 30 mins/day x 6 days                                             | YES                                                     | <b>YES:</b> at 10 and at 20 weeks                                                       | <b>NO:</b> no improvement on category fluency for unpracticed categories/items                                                                                                     |
| Green Heredia et al. 2009 | Sv           | Computer based presentation of picture alone then picture + read aloud written name, home practice daily for 1 month; Errorless approach | YES                                                     | <b>YES:</b> at 6 mos.                                                                   | <b>YES:</b> on naming of alternative exemplars (pictures) of treated items, but only if the exemplar was visually similar to the picture used in therapy                           |
| Henry et al. 2008         | 1 Nf<br>2 Sv | Guided retrieval on semantic tasks/strategic element/multiple baseline design                                                            | PA1-large effect<br>PA2-small effect                    | <b>YES:</b> PA1 at 3wks + 4mos ;<br><b>NO:</b> PA2<br><b>YES:</b> LH at 3 wks and 4 mos | <b>YES:</b> in one of the PPA patients (PA 1) who showed improvement in semantic fluency for untreated categories, but the effect was transient (not present at 4-month follow-up) |
| Henry et al. 2019         | 9 Sv<br>9 Lv | Naming therapy for two groups: 1x week & 2x week<br>Daily home practice                                                                  | YES, regardless of tx frequency                         | <b>YES:</b> Up to 1 yr post-tx for some                                                 | <b>YES:</b> Generalization to untx'd items up to 6 mos post-tx                                                                                                                     |
| Hoffman et al. 2015       | 3 Sv         | Naming with two manipulations: Varied order of administration<br>Multiple exemplars of a single item                                     | YES for MB & JW<br>NO for MT                            | <b>YES:</b> for MB& JW at 1wk, 4 wks, 4 mos a 7 7 mos<br><b>NO:</b> for MT              | <b>NO</b> for either participant                                                                                                                                                   |
| Jokel at al. 2006         | 1 Sv         | Picture + reading name aloud + read personally relevant description. Home practice 30 min/day x 6 days; Errorless approach               | YES, better recall for items with partial sem knowledge | <b>YES:</b> at 1 mo                                                                     | <b>NO:</b> there was little improvement in control (untreated) items on picture naming                                                                                             |
| Jokel & Anderson 2008     | 3 Sv         | Errorless learning of 4 sets of 15 words each                                                                                            | YES: improvements in naming and comprehension           | <b>YES:</b> at 1 and 3 mos                                                              | NR                                                                                                                                                                                 |

|                              |              |                                                                                                                                                            |                                                                            |                                                                           |                                                                                                                                                                                        |
|------------------------------|--------------|------------------------------------------------------------------------------------------------------------------------------------------------------------|----------------------------------------------------------------------------|---------------------------------------------------------------------------|----------------------------------------------------------------------------------------------------------------------------------------------------------------------------------------|
| Jokel & Anderson 2009b, 2012 | 7 Sv         | Pre-post design X 4 conditions : Errorless-Passive Errorless-Active Errorful-Passive Errorful-Active                                                       | YES: all but one participant (Sv profile but later diagnosed with CADASIL) | <b>YES:</b> at 1 & 3 mos, Some improvement on sentence production         | <b>YES:</b> untreated items on semantic fluency tasks & on naming. 3 patients reported use of re-learned words in daily life                                                           |
| Jokel et al. 2007; 2010      | 1 Sv         | Computer-based tx; Pictures paired with labels; Multiple baseline across behaviours, unknown + known tx; known untreated; EL                               | YES<br>Large effect                                                        | <b>YES:</b> at 1&3 mos.                                                   | <b>YES:</b> treated words in a new context;<br><b>NO</b> on untreated items.<br><b>Limited</b> gains on a sentence production task and semantic fluency tasks (treated items produced) |
| Jokel et al. 2006b 2009a     | 2 Nf         | Multiple baselines across behaviours                                                                                                                       | YES<br>Over 80% improvement                                                | <b>YES:</b> at 1 mo<br><b>NO:</b> at 6 mos.                               | <b>YES:</b> on a syntactic/sentence production task which did not include treated items.<br><b>NO:</b> on untreated items in a naming task.                                            |
| Krajenbrink et al 2020       | 1 Sv         | RRiPP + COEN (delivered via Skype)                                                                                                                         | Improvement in spoken and written word retrieval                           | <b>YES:</b> Better when written words were required                       | <b>YES:</b> on comprehension with COEN                                                                                                                                                 |
| Lavoie et al 2020            | 5 PPA        | Self-administered tx, ABA design with 4 lists; 1-trained functional words, 2-trained words from picture database, 3-exposed but not trained, 4-control set | Improvement for all 5 participants                                         | <b>YES:</b> 2 mos post-tx                                                 | <b>Some</b> evidence of generalization in conversation                                                                                                                                 |
| Meyer et al 2019             | PPA          | Phonological & orthographic tx of naming x 6 mos                                                                                                           | YES                                                                        | <b>YES:</b> Up to 15 mos for all<br>More robust in orthographic tx for Sv | NR                                                                                                                                                                                     |
| Newhart et al. 2009          | 1 Lv<br>1 Sv | Reading name of pictured object + repeating; organized by category; pre-post test                                                                          | YES for naming in both patients                                            | NR                                                                        | <b>YES:</b> for Lv on naming of untreated items in treated & untreated, categories. No change in reading comprehension <b>NO</b> for Sv                                                |

|                       |      |                                                                                                                                                                                                                                                |                                                                                                   |                                                                                                    |                                                                                                                                                                                   |
|-----------------------|------|------------------------------------------------------------------------------------------------------------------------------------------------------------------------------------------------------------------------------------------------|---------------------------------------------------------------------------------------------------|----------------------------------------------------------------------------------------------------|-----------------------------------------------------------------------------------------------------------------------------------------------------------------------------------|
| Robinson et al. 2009  | 2 Sv | Ltd # of sessions<br>Object naming, definition, and use were trained                                                                                                                                                                           | YES: varied<br>HD: improved on naming definitions and use;<br>VH: definitions                     | <b>YES:</b> At 1 mo: HD for Use Naming & Definitions<br><b>NO:</b> VH                              | NR                                                                                                                                                                                |
| Savage et al. 2013    | 4 Sv | Repetitive practice of word-picture pairing carried at participants' homes                                                                                                                                                                     | YES: Improvement in all participants regardless of severity                                       | <b>YES:</b> Large effects for all participants at 3 wks and 7-8 weeks for SD1 & SD3.               | NR                                                                                                                                                                                |
| Savage et al. 2014    | 5 Sv | 2 month online word training                                                                                                                                                                                                                   | YES: all participants on naming of treated items                                                  | NR                                                                                                 | <b>YES:</b> for tx'd words; 4/5 participants improved on a video description task. Mild pts on following verbal instructions, severe pts on word-picture matching                 |
| Savage et al. 2015    | 9 Sv | 2 month computer-based program with 75-100 words; Photos combined with audio cues                                                                                                                                                              | YES: all participants on naming of treated items                                                  | <b>YES:</b> 5 pts 2 mos post & 6 pts 3 mos post; Booster sessions added                            | NR                                                                                                                                                                                |
| Schneider et al. 1996 | 1 Nf | Verbal + gesture training of targets in sentences x 18 sessions. Home practice with pictures of gestures; Note: verb production in context of sentences (not anomia tx per se)                                                                 | YES                                                                                               | <b>YES:</b> gestures<br><b>NO:</b> words at 3 mos                                                  | <b>YES:</b> improved verb production (for treated tenses) with untreated verbs in sentence production task                                                                        |
| Snowden & Neary 2002  | 2 Sv | Errorless pairing of picture with spoken and written name; Studied picture, written name and information relevant to personal experience in 2 treatment sessions. Home practice 20 min/day x 3 weeks; EL; pre-test – pos-test, cued vs. uncued | YES: for items with partial sem knowledge; marginal for items with no knowledge<br>YES: on day 20 | <b>YES:</b> up to 8 mos correlated with meaningfulness (autobiographical experiential association) | <b>NO:</b> naming of treated items in a new context (different presentation order, different coloured paper & on loose sheets of paper instead of the test booklet);<br>NR for KB |

|                           |      |                                                                                                         |                                                            |                                                                                       |                                                                                                                            |
|---------------------------|------|---------------------------------------------------------------------------------------------------------|------------------------------------------------------------|---------------------------------------------------------------------------------------|----------------------------------------------------------------------------------------------------------------------------|
| Trebbastoni et al. (2013) | 1 Lv | rTMS delivered over the left DLPC<br>Pre-post real vs. sham<br>No items that were specifically trained. | Improvement on word generation and scores on written texts | <b>NO</b> (after 7 days) on word generation;<br><b>YES</b> : on written text measures | Not measured but some improvement in word retrieval & crossword puzzles reported following real, but not the sham session. |
|---------------------------|------|---------------------------------------------------------------------------------------------------------|------------------------------------------------------------|---------------------------------------------------------------------------------------|----------------------------------------------------------------------------------------------------------------------------|

*Note.* Tx = therapy; Sv = semantic variant PPA; Lv = logopenic variant PPA; Nf = nonfluent/agrammatic variant PPA; RRiPP = Repetition & Reading in the Presence of a Picture; sem = semantic; phon = phonological; COEN=Conceptual Enrichment.
